# Supplementary material for: Systematic metabolic engineering of Bacillus licheniformis for hyperproduction of the antioxidant hydroxytyrosol
Source: Royal Society of Chemistry journal article supplement (doi:10.1039/d3gc01773g), 2023-01-01
Supplement: d3gc01773g1.pdf [file d3gc01773g1.pdf]

## Green Chemistry

### Supplementary Materials for

#### Systematic Metabolic Engineering of *Bacillus licheniformis* for Hyperproduction of Antioxidant Hydroxytyrosol

Yangyang Zhan<sup>1#</sup>, Fei Zhou<sup>1#</sup>, Wenqi Ruan<sup>1</sup>, Hao Yin<sup>1</sup>, Zhi Li<sup>1</sup>, Huan Wang<sup>1</sup>, Tao Li<sup>2</sup>,  
Dongbo Cai<sup>1,2</sup>, Shihui Yang<sup>1</sup>, Xin Ma<sup>1\*</sup>, Shouwen Chen<sup>1\*</sup>

<sup>1</sup> *State Key Laboratory of Biocatalysis and Enzyme Engineering, Environmental  
Microbial Technology Center of Hubei Province, School of Life Sciences, Hubei  
University, Wuhan 430062, People's Republic of China*

<sup>2</sup> *Zhuhai Winzyme Biotech Co., Ltd, Zhuhai, 519000, People's Republic of China*

# These authors contributed equally to this work.

\*Corresponding authors: X Ma and S Chen

E-mail address: maxin@hubu.edu.cn (X Ma); mel212@126.com (S Chen).

Tel./fax.: +86 027-88666081

Postal address: 368 Youyi Avenue, Wuhan 430062, Hubei, PR China

**Table S1 Strains and plasmids used in this study**

| Strains                 | Characteristics                                                                                                                                                                                                                     | Sources    |
|-------------------------|-------------------------------------------------------------------------------------------------------------------------------------------------------------------------------------------------------------------------------------|------------|
| <i>B. licheniformis</i> |                                                                                                                                                                                                                                     |            |
| DWc9n                   | DW2 with Cas9n integrated strain                                                                                                                                                                                                    | 1          |
| DW3                     | DWc9n- <i>xkdE</i> :: <i>yugJ</i>                                                                                                                                                                                                   | Lab stock  |
| DW4                     | DWc9nΔ <i>pyk-xkdE</i> :: <i>yugJ</i>                                                                                                                                                                                               | Lab stock  |
| DH1                     | DWc9nΔ <i>pyk-xkdE</i> :: <i>yugJ-ldh</i> :: <i>tyrA<sup>fbr</sup></i>                                                                                                                                                              | This study |
| DH2                     | DWc9nΔ <i>pyk-xkdE</i> :: <i>yugJ-ldh</i> :: <i>tyrA<sup>fbr</sup>-xkdG</i> :: <i>aroG<sup>fbr</sup></i>                                                                                                                            | This study |
| DH3                     | DWc9nΔ <i>pyk-xkdE</i> :: <i>yugJ-ldh</i> :: <i>tyrA<sup>fbr</sup>-xkdG</i> :: <i>aroG<sup>fbr</sup>-PbacA-aroK</i>                                                                                                                 | This study |
| DH4                     | DWc9nΔ <i>pyk-xkdE</i> :: <i>yugJ-ldh</i> :: <i>tyrA<sup>fbr</sup>-xkdG</i> :: <i>aroG<sup>fbr</sup>-PbacA-aroKΔpheA</i>                                                                                                            | This study |
| DH5                     | DWc9nΔ <i>pyk-xkdE</i> :: <i>yugJ-ldh</i> :: <i>tyrA<sup>fbr</sup>-xkdG</i> :: <i>aroG<sup>fbr</sup>-PbacA-aroKΔpheAΔhisC</i>                                                                                                       | This study |
| DH6                     | DWc9nΔ <i>pyk-xkdE</i> :: <i>yugJ-ldh</i> :: <i>tyrA<sup>fbr</sup>-xkdG</i> :: <i>aroG<sup>fbr</sup>-PbacA-aroKΔpheAΔhisCΔdhaS</i>                                                                                                  | This study |
| DH7                     | DWc9nΔ <i>pyk-xkdE</i> :: <i>yugJ-ldh</i> :: <i>tyrA<sup>fbr</sup>-xkdG</i> :: <i>aroG<sup>fbr</sup>-PbacA-aroKΔpheAΔhisCΔdhaSΔdhbC</i>                                                                                             | This study |
| DH8                     | DWc9nΔ <i>pyk-xkdE</i> :: <i>yugJ-ldh</i> :: <i>tyrA<sup>fbr</sup>-xkdG</i> :: <i>aroG<sup>fbr</sup>-PbacA-aroKΔpheAΔhisCΔdhaSΔdhbCΔadhA</i>                                                                                        | This study |
| DH9                     | DWc9nΔ <i>pyk-xkdE</i> :: <i>yugJ-ldh</i> :: <i>tyrA<sup>fbr</sup>-xkdG</i> :: <i>aroG<sup>fbr</sup>-PbacA-aroKΔpheAΔhisCΔdhaSΔdhbCΔadhA-PbacA-glcU-PbacA-glcK</i>                                                                  | This study |
| DH10                    | DWc9nΔ <i>pyk-xkdE</i> :: <i>yugJ-ldh</i> :: <i>tyrA<sup>fbr</sup>-xkdG</i> :: <i>aroG<sup>fbr</sup>-PbacA-aroKΔpheAΔhisCΔdhaSΔdhbCΔadhA-PbacA-glcU-PbacA-glcK-ParoK-ptsG</i>                                                       | This study |
| DH11                    | DWc9nΔ <i>pyk-xkdE</i> :: <i>yugJ-ldh</i> :: <i>tyrA<sup>fbr</sup>-yvnA</i> :: <i>tyrA<sup>fbr</sup>-xkdG</i> :: <i>aroG<sup>fbr</sup>-PbacA-aroKΔpheAΔhisCΔdhaSΔdhbCΔadhA-PbacA-glcU-PbacA-glcK-ParoK-ptsG</i>                     | This study |
| DH12                    | DWc9nΔ <i>pyk-xkdE</i> :: <i>yugJ-ldh</i> :: <i>tyrA<sup>fbr</sup>-yvnA</i> :: <i>tyrA<sup>fbr</sup>-xkdG</i> :: <i>aroG<sup>fbr</sup>-PbacA-aroKΔpheAΔhisCΔdhaSΔdhbCΔadhA-PbacA-glcU-PbacA-glcK-ParoK-ptsG-PbacA-tkt</i>           | This study |
| DH13                    | DWc9nΔ <i>pyk-xkdE</i> :: <i>yugJ-ldh</i> :: <i>tyrA<sup>fbr</sup>-yvnA</i> :: <i>tyrA<sup>fbr</sup>-xkdG</i> :: <i>aroG<sup>fbr</sup>-PbacA-aroKΔpheAΔhisCΔdhaSΔdhbCΔadhA-PbacA-glcU-PbacA-glcK-ParoK-ptsG-PbacA-tkt-PbacA-zwf</i> | This study |

DH14 DWc9nΔ*pyk-xkdE::yugJ-ldh::tyrA<sup>fbr</sup>-yvnA::tyrA<sup>fbr</sup> - This study*

*xkdG::aroG<sup>fbr</sup>-PbacA-*

*aroKΔpheAΔhisCΔdhaSΔdhbCΔadhA-PbacA-*

*glcU-PbacA-glcK-ParoK-ptsG- lanP-P43-*

*Bbx<sup>fpk</sup><sup>opt</sup>*

| Strains                             | Characteristics                                                        | Sources    |
|-------------------------------------|------------------------------------------------------------------------|------------|
| DHT1                                | DW3/pHY- <i>PbacA-kivD</i> -P43- <i>hpaBC</i>                          | This study |
| DHT2                                | DW3/pHY- <i>PbacA-kivD<sup>V1</sup></i> -P43- <i>hpaBC</i>             | This study |
| DHT3                                | DW4/pHY- <i>PbacA-kivD<sup>V1</sup></i> -P43- <i>hpaBC</i>             | This study |
| DHT4                                | DH1/pHY- <i>PbacA-kivD<sup>V1</sup></i> -P43- <i>hpaBC</i>             | This study |
| DHT5                                | DH2/pHY- <i>PbacA-kivD<sup>V1</sup></i> -P43- <i>hpaBC</i>             | This study |
| DHT6                                | DH3/pHY- <i>PbacA-kivD<sup>V1</sup></i> -P43- <i>hpaBC</i>             | This study |
| DHT7                                | DH4/pHY- <i>PbacA-kivD<sup>V1</sup></i> -P43- <i>hpaBC</i>             | This study |
| DHT8                                | DH5/pHY- <i>PbacA-kivD<sup>V1</sup></i> -P43- <i>hpaBC</i>             | This study |
| DHT9                                | DH6/pHY- <i>PbacA-kivD<sup>V1</sup></i> -P43- <i>hpaBC</i>             | This study |
| DHT10                               | DH7/pHY- <i>PbacA-kivD<sup>V1</sup></i> -P43- <i>hpaBC</i>             | This study |
| DHT11                               | DH8/pHY- <i>PbacA-kivD<sup>V1</sup></i> -P43- <i>hpaBC</i>             | This study |
| DHT12                               | DH10/pHY- <i>PbacA-kivD<sup>V1</sup></i> -P43- <i>hpaBC</i>            | This study |
| DHT13                               | DH10/pHY- <i>PbacA-kivD<sup>V1</sup></i> - <i>PbacA-hpaBC</i>          | This study |
| DHT14                               | DH10/pHY- <i>PbacA-kivD<sup>V1</sup></i> - <i>Pbay-hpaBC</i>           | This study |
| DHT15                               | DH10/pHY-P43- <i>kivD<sup>V1</sup></i> -P43- <i>hpaBC</i>              | This study |
| DHT16                               | DH10/pHY-P43- <i>kivD<sup>V1</sup></i> - <i>PbacA-hpaBC</i>            | This study |
| DHT17                               | DH10/pHY-P43- <i>kivD<sup>V1</sup></i> - <i>Pbay-hpaBC</i>             | This study |
| DHT18                               | DH10/pHY- <i>Pbay-kivD<sup>V1</sup></i> -P43- <i>hpaBC</i>             | This study |
| DHT19                               | DH10/pHY- <i>Pbay-kivD<sup>V1</sup></i> - <i>PbacA-hpaBC</i>           | This study |
| DHT20                               | DH10/pHY- <i>Pbay-kivD<sup>V1</sup></i> - <i>Pbay-hpaBC</i>            | This study |
| DHT21                               | DH11/pHY-P43- <i>kivD<sup>V1</sup></i> - <i>Pbay-hpaBC</i>             | This study |
| DHT22                               | DH12/pHY-P43- <i>kivD<sup>V1</sup></i> - <i>Pbay-hpaBC</i>             | This study |
| DHT23                               | DH13/pHY-P43- <i>kivD<sup>V1</sup></i> - <i>Pbay-hpaBC</i>             | This study |
| DHT24                               | DH14/pHY-P43- <i>kivD<sup>V1</sup></i> - <i>Pbay-hpaBC</i>             |            |
| DWc9n/pHY- <i>kivD</i>              | DWc9n harboring pHY- <i>kivD<sup>V461</sup></i> , Tet <sup>r</sup>     | This study |
| DWc9n/pHY- <i>kivD<sup>VY</sup></i> | DWc9n harboring pHY- <i>PbacA-kivD<sup>VY</sup></i> , Tet <sup>r</sup> | This study |
| DWc9n/pHY- <i>kivD<sup>VT</sup></i> | DWc9n harboring pHY- <i>PbacA-kivD<sup>VT</sup></i> , Tet <sup>r</sup> | This study |
| DWc9n/pHY- <i>kivD<sup>VF</sup></i> | DWc9n harboring pHY- <i>PbacA-kivD<sup>VF</sup></i> , Tet <sup>r</sup> | This study |
| DWc9n/pHY- <i>kivD<sup>VH</sup></i> | DWc9n harboring pHY- <i>PbacA-kivD<sup>VH</sup></i> , Tet <sup>r</sup> | This study |
| DWc9n/pHY- <i>kivD<sup>VR</sup></i> | DWc9n harboring pHY- <i>PbacA-kivD<sup>VR</sup></i> , Tet <sup>r</sup> | This study |
| DWc9n/pHY-                          | DWc9n harboring pHY- <i>PbacA-kivD<sup>VA</sup></i> , Tet <sup>r</sup> | This study |

| <i>kivD<sup>VA</sup></i>               |                                                                        |                |
|----------------------------------------|------------------------------------------------------------------------|----------------|
| DWc9n/pHY-<br><i>kivD<sup>VG</sup></i> | DWc9n harboring pHY- <i>PbacA-kivD<sup>VG</sup></i> , Tet <sup>r</sup> | This study     |
| DWc9n/pHY-<br><i>kivD<sup>VI</sup></i> | DWc9n harboring pHY- <i>PbacA-kivD<sup>VI</sup></i> , Tet <sup>r</sup> | This study     |
| <b>Strains</b>                         | <b>Characteristics</b>                                                 | <b>Sources</b> |
| DWc9n/pHY-<br><i>kivD<sup>VM</sup></i> | DWc9n harboring pHY- <i>PbacA-kivD<sup>VM</sup></i> , Tet <sup>r</sup> | This study     |
| DWc9n/pHY-<br><i>kivD<sup>VS</sup></i> | DWc9n harboring pHY- <i>PbacA-kivD<sup>VS</sup></i> , Tet <sup>r</sup> | This study     |
| DWc9n/pHY-<br><i>kivD<sup>VN</sup></i> | DWc9n harboring pHY- <i>PbacA-kivD<sup>VN</sup></i> , Tet <sup>r</sup> | This study     |
| DWc9n/pHY-<br><i>kivD<sup>VK</sup></i> | DWc9n harboring pHY- <i>PbacA-kivD<sup>VK</sup></i> , Tet <sup>r</sup> | This study     |
| DWc9n/pHY-<br><i>kivD<sup>VD</sup></i> | DWc9n harboring pHY- <i>PbacA-kivD<sup>VD</sup></i> , Tet <sup>r</sup> | This study     |
| DWc9n/pHY-<br><i>kivD<sup>VE</sup></i> | DWc9n harboring pHY- <i>PbacA-kivD<sup>VE</sup></i> , Tet <sup>r</sup> | This study     |
| DWc9n/pHY-<br><i>kivD<sup>VW</sup></i> | DWc9n harboring pHY- <i>PbacA-kivD<sup>VW</sup></i> , Tet <sup>r</sup> | This study     |
| DWc9n/pHY-<br><i>kivD<sup>VP</sup></i> | DWc9n harboring pHY- <i>PbacA-kivD<sup>VP</sup></i> , Tet <sup>r</sup> | This study     |
| DWc9n/pHY-<br><i>kivD<sup>VQ</sup></i> | DWc9n harboring pHY- <i>PbacA-kivD<sup>VQ</sup></i> , Tet <sup>r</sup> | This study     |
| DWc9n/pHY-<br><i>kivD<sup>VC</sup></i> | DWc9n harboring pHY- <i>PbacA-kivD<sup>VC</sup></i> , Tet <sup>r</sup> | This study     |
| DWc9n/pHY-<br><i>kivD<sup>VL</sup></i> | DWc9n harboring pHY- <i>PbacA-kivD<sup>VL</sup></i> , Tet <sup>r</sup> | This study     |
| DWc9nΔ <i>adh8</i>                     | DWc9n with <i>adh8</i> deletion                                        | Lab stock      |
| DWc9nΔ <i>yimD</i>                     | DWc9n with <i>yimD</i> deletion                                        | Lab stock      |
| DWc9nΔ <i>adh4</i>                     | DWc9n with <i>adh4</i> deletion                                        | Lab stock      |
| DWc9nΔ <i>yogA</i>                     | DWc9n with <i>yogA</i> deletion                                        | Lab stock      |
| DWc9nΔ <i>gbsB</i>                     | DWc9n with <i>gbsB</i> deletion                                        | Lab stock      |
| DWc9nΔ <i>ybdH</i>                     | DWc9n with <i>ybdH</i> deletion                                        | Lab stock      |
| DWc9nΔ <i>adhE</i>                     | DWc9n with <i>adhE</i> deletion                                        | Lab stock      |
| DWc9nΔ <i>yfmJ</i>                     | DWc9n with <i>yfmJ</i> deletion                                        | Lab stock      |
| DWc9nΔ <i>adhB</i>                     | DWc9n with <i>adhB</i> deletion                                        | Lab stock      |
| DWc9nΔ <i>adhZ</i>                     | DWc9n with <i>adhZ</i> deletion                                        | Lab stock      |
| DWc9nΔ <i>yogA</i>                     | DWc9n with <i>yogA</i> deletion                                        | Lab stock      |
| DWc9nΔ <i>yugK</i>                     | DWc9n with <i>yugK</i> deletion                                        | Lab stock      |
| DWc9nΔ <i>yugJ</i>                     | DWc9n with <i>yugJ</i> deletion                                        | Lab stock      |
| DWc9nΔ <i>adhA</i>                     | DWc9n with <i>adhA</i> deletion                                        | Lab stock      |
| DWc9n/pHY-300                          | DWc9n harboring pHY-300, Tet <sup>r</sup>                              | Lab stock      |

| <i>Escherichia coli</i><br>DH5a                        | F <sup>-</sup> Φ80d/ <i>lacZ</i> ΔM15, Δ( <i>lacZYA-argF</i> ) U169, <i>recA1</i> ,<br><i>endA1</i> , <i>hsdR17</i> ( <i>r<sub>K</sub><sup>-</sup></i> , <i>m<sub>K</sub><sup>+</sup></i> ), <i>phoA</i> , <i>supE44</i> , λ <sup>-</sup> , <i>thi-1</i> ,<br><i>gyrA96</i> , <i>relA1</i> | Lab stock  |
|--------------------------------------------------------|--------------------------------------------------------------------------------------------------------------------------------------------------------------------------------------------------------------------------------------------------------------------------------------------|------------|
| BL21(DE3)                                              | F <sup>-</sup> , <i>ompT</i> , <i>hsdS<sub>B</sub></i> ( <i>r<sub>B</sub><sup>-</sup>m<sub>B</sub><sup>-</sup></i> ), <i>gal</i> ( <i>λcI857</i> , <i>ind1</i> , <i>Sam7</i> ,<br><i>nin5</i> , <i>lacUV5-T7 gene1</i> ), <i>dcm</i> (DE3)                                                 | Lab stock  |
| Plasmids                                               | Characteristics                                                                                                                                                                                                                                                                            | Source     |
| BL21(DE3)/pET-28a(+)                                   | BL21(DE3) harboring pET-28a(+), Kan <sup>r</sup>                                                                                                                                                                                                                                           | Lab stock  |
| BL21(DE3)/pET-28a(+) <i>kivD</i>                       | BL21(DE3) harboring pET-28a(+) <i>kivD</i> , Kan <sup>r</sup>                                                                                                                                                                                                                              | This study |
| BL21(DE3)/pET-28a(+) <i>kivD<sup>VI</sup></i>          | BL21(DE3) harboring pET-28a(+) <i>kivD<sup>VI</sup></i> , Kan <sup>r</sup>                                                                                                                                                                                                                 | This study |
| T <sub>2</sub> (2)-Ori                                 | <i>E. coli</i> and <i>B. subtilis</i> shuttle vector, Kan <sup>r</sup>                                                                                                                                                                                                                     | Lab stock  |
| pHY300PLK                                              | <i>E. coli</i> - <i>Bacillus</i> shuttle vector; Amp <sup>r</sup> in <i>E. coli</i> , Tc <sup>r</sup><br>in both <i>E. coli</i> and <i>B. licheniformis</i>                                                                                                                                | Lab stock  |
| pHY- <i>kivD</i>                                       | pHY300 containing <i>kivD</i> gene with PbacA                                                                                                                                                                                                                                              | This study |
| pHY- <i>kivD<sup>VY</sup></i>                          | pHY300 containing <i>kivD<sup>VY</sup></i> gene with PbacA                                                                                                                                                                                                                                 | This study |
| pHY- <i>kivD<sup>VT</sup></i>                          | pHY300 containing <i>kivD<sup>VT</sup></i> gene with PbacA                                                                                                                                                                                                                                 | This study |
| pHY- <i>kivD<sup>VF</sup></i>                          | pHY300 containing <i>kivD<sup>VF</sup></i> gene with PbacA                                                                                                                                                                                                                                 | This study |
| pHY- <i>kivD<sup>VH</sup></i>                          | pHY300 containing <i>kivD<sup>VH</sup></i> gene with PbacA                                                                                                                                                                                                                                 | This study |
| pHY- <i>kivD<sup>VR</sup></i>                          | pHY300 containing <i>kivD<sup>VR</sup></i> gene with PbacA                                                                                                                                                                                                                                 | This study |
| pHY- <i>kivD<sup>VA</sup></i>                          | pHY300 containing <i>kivD<sup>VA</sup></i> gene with PbacA                                                                                                                                                                                                                                 | This study |
| pHY- <i>kivD<sup>VG</sup></i>                          | pHY300 containing <i>kivD<sup>VG</sup></i> gene with PbacA                                                                                                                                                                                                                                 | This study |
| pHY- <i>kivD<sup>VI</sup></i>                          | pHY300 containing <i>kivD<sup>VI</sup></i> gene with PbacA                                                                                                                                                                                                                                 | This study |
| pHY- <i>kivD<sup>VM</sup></i>                          | pHY300 containing <i>kivD<sup>VM</sup></i> gene with PbacA                                                                                                                                                                                                                                 | This study |
| pHY- <i>kivD<sup>VS</sup></i>                          | pHY300 containing <i>kivD<sup>VS</sup></i> gene with PbacA                                                                                                                                                                                                                                 | This study |
| pHY- <i>kivD<sup>VN</sup></i>                          | pHY300 containing <i>kivD<sup>VN</sup></i> gene with PbacA                                                                                                                                                                                                                                 | This study |
| pHY- <i>kivD<sup>VK</sup></i>                          | pHY300 containing <i>kivD<sup>VK</sup></i> gene with PbacA                                                                                                                                                                                                                                 | This study |
| pHY- <i>kivD<sup>VD</sup></i>                          | pHY300 containing <i>kivD<sup>VD</sup></i> gene with PbacA                                                                                                                                                                                                                                 | This study |
| pHY- <i>kivD<sup>VE</sup></i>                          | pHY300 containing <i>kivD<sup>VE</sup></i> gene with PbacA                                                                                                                                                                                                                                 | This study |
| pHY- <i>kivD<sup>VW</sup></i>                          | pHY300 containing <i>kivD<sup>VW</sup></i> gene with PbacA                                                                                                                                                                                                                                 | This study |
| pHY- <i>kivD<sup>VP</sup></i>                          | pHY300 containing <i>kivD<sup>VP</sup></i> gene with PbacA                                                                                                                                                                                                                                 | This study |
| pHY- <i>kivD<sup>VQ</sup></i>                          | pHY300 containing <i>kivD<sup>VQ</sup></i> gene with PbacA                                                                                                                                                                                                                                 | This study |
| pHY- <i>kivD<sup>VC</sup></i>                          | pHY300 containing <i>kivD<sup>VC</sup></i> gene with PbacA                                                                                                                                                                                                                                 | This study |
| pHY- <i>kivD<sup>VL</sup></i>                          | pHY300 containing <i>kivD<sup>VL</sup></i> gene with PbacA                                                                                                                                                                                                                                 | This study |
| pHY-P43- <i>hpaBC</i>                                  | pHY300 containing <i>hpaBC</i> with P43 promoter                                                                                                                                                                                                                                           | This study |
| pHY-PbacA- <i>kivD<sup>VI</sup></i> -P43- <i>hpaBC</i> | pHY300 containing <i>kivD<sup>VI</sup></i> with PbacA promoter and<br><i>hpaBC</i> genes with P43 promoter, respectively                                                                                                                                                                   | This study |
| pHYΔ <i>adhA</i>                                       | pHY300 containing P43 (no RBS) +sgRNA<br>( <i>adhA</i> )+ <i>adhA</i> up arm+ down arm                                                                                                                                                                                                     | Lab stock  |
| pHYΔ <i>pheA</i>                                       | pHY300 containing P43 (no RBS) +sgRNA ( <i>pheA</i> )<br>+ <i>pheA</i> up arm+ down arm                                                                                                                                                                                                    | This study |
| pHYΔ <i>hisC</i>                                       | pHY300 containing P43 (no RBS) +sgRNA ( <i>hisC</i> )                                                                                                                                                                                                                                      | Lab stock  |

| pHY $\Delta$ <i>dhaS</i>                           | + <i>hisC</i> up arm+ down arm<br>pHY300 containingP43 (no RBS) +sgRNA<br>( <i>dhaS</i> )+ <i>dhaS</i> up arm+ down arm | Lab stock  |
|----------------------------------------------------|-------------------------------------------------------------------------------------------------------------------------|------------|
| pHY $\Delta$ <i>dhbC</i>                           | pHY300 containingP43 (no RBS) +sgRNA<br>( <i>dhbC</i> )+ <i>dhbC</i> up arm+ down arm                                   | This study |
| Plasmids                                           | Characteristics                                                                                                         | Source     |
| T <sub>2</sub> (2)- <i>ldh-tyrA<sup>fbr</sup></i>  | T <sub>2</sub> (2) containing <i>ldh</i> up arm+PylB+ <i>tyrA<sup>fbr</sup></i> + <i>ldh</i> down arm                   | This study |
| T <sub>2</sub> (2)- <i>yvnA-tyrA<sup>fbr</sup></i> | T <sub>2</sub> (2) containing <i>yvnA</i> up arm+P43+ <i>tyrA<sup>fbr</sup></i> + <i>yvnA</i> down arm                  | This study |
| T <sub>2</sub> (2)- <i>xkdE-aroG<sup>fbr</sup></i> | T <sub>2</sub> (2) containing <i>xkdE</i> up arm+P43+ <i>aroG<sup>fbr</sup></i> +TamyL+ <i>xkdE</i> down arm            | Lab stock  |
| T <sub>2</sub> (2)-PbacA- <i>aroK</i>              | T <sub>2</sub> (2) containing <i>ParoK</i> up arm+PbacA+ <i>ParoK</i> down arm                                          | Lab stock  |
| T <sub>2</sub> (2)-PbacA- <i>glcU</i>              | T <sub>2</sub> (2) containing <i>PglcU</i> up arm+PbacA+ <i>PglcU</i> down arm                                          | Lab stock  |
| T <sub>2</sub> (2)-PbacA- <i>glcK</i>              | T <sub>2</sub> (2) containing <i>PglcK</i> up arm+PbacA+ <i>PglcK</i> down arm                                          | Lab stock  |
| T <sub>2</sub> (2)-ParoK- <i>ptsG</i>              | T <sub>2</sub> (2) containing <i>PptsG</i> up arm+ <i>ParoK</i> + <i>PptsG</i> down arm                                 | Lab stock  |
| T <sub>2</sub> (2)-PbacA- <i>tkt</i>               | T <sub>2</sub> (2) containing <i>Ptkt</i> up arm+PbacA+ <i>Ptkt</i> down arm                                            | This study |
| T <sub>2</sub> (2)-PbacA- <i>zwf</i>               | T <sub>2</sub> (2) containing <i>Pzwf</i> up arm+PbacA+ <i>Ptkt</i> down arm                                            | This study |

**Table S2 The varied metabolites between the DHT12 and DHT17 strains**

| <b>Metabolites name</b>     | <b>Ratio (DHT17/DHT12)</b> |             |             |
|-----------------------------|----------------------------|-------------|-------------|
|                             | <b>24 h</b>                | <b>36 h</b> | <b>48 h</b> |
| <b>Up-regulation</b>        |                            |             |             |
| D-Fructose 6-phosphate      | 4.60                       | 4.94        | /           |
| Xylose                      | 22.70                      | 4.47        | 1.91        |
| Gluconic acid               | /                          | 45.11       | 3.83        |
| D-Xylulose                  | 9.63                       | /           | 6.00        |
| Xylitol                     | 20.82                      | 6.40        | 3.03        |
| Lyxose                      | 17.30                      | 6.05        | 3.06        |
| 4-Hydroxyphenylpyruvic acid | down                       | /           | 2.37        |
| Maleamic acid               | 4.42                       | 35.44       | 7.02        |
| N-Acetyl-D-hexosamine       | 2.22                       | 3.12        | 4.25        |
| Tyrosol                     | 2.92                       | 2.33        | 1.91        |
| <b>Down-regulation</b>      |                            |             |             |
| L-Methionine                | 0.35                       | /           | /           |
| L-Leucine                   | 0.26                       | 0.50        | 0.24        |
| L-Valine                    | 0.19                       | 0.20        | 0.14        |
| L-Threonine                 | /                          | /           | 0.10        |
| Malonic acid                | /                          | /           | 0.17        |
| D-Isocitric acid            | 0.29                       | /           | /           |
| D-(+)-Glucosamine           | 0.40                       | /           | /           |
| L-Isoleucine                | 0.44                       | /           | 0.23        |
| N-alpha-Acetyl-L-ornithine  | 0.08                       | 0.13        | 0.08        |
| Oleic acid                  | 0.36                       | /           | /           |
| Pantothenic acid            | 0.34                       | /           | /           |
| 4-Hydroxyphenylpyruvic acid | 0.36                       | /           | up          |
| D-Trehalose                 | /                          | 0.45        |             |
| L-Iditol                    | /                          | /           | 0.30        |
| Stearic acid                | /                          | /           | 0.09        |
| Gly-Gly                     | /                          | 0.43        | /           |

The varied metabolites between the DHT12 and DHT17 strains were listed based on ratios  $>2$  and  $p$ -values  $< 0.05$  for the Student's T-test. “/” means that the abundance of metabolite is not significant in this time point.

**Table S3 Summary of hydroxytyrosol (HT) production from simple carbon sources by engineered microorganisms**

| Strains                 | Carbon source       | Characteristics                                                                                                                                   | HT titer (mg/L)                                   | HT yield mg/g     | Productivity (mg/L/h) | References |
|-------------------------|---------------------|---------------------------------------------------------------------------------------------------------------------------------------------------|---------------------------------------------------|-------------------|-----------------------|------------|
| <i>E. coli</i>          | Glucose             | <i>TH, PCD, DHPR, DDC</i> and <i>TYO, ΔfeaB</i>                                                                                                   | 12.3<br>shake flasks                              | 1.2               | 0.17                  | 2          |
| <i>E. coli</i>          | Glucose             | <i>aroG<sup>br</sup>, tyrA<sup>br</sup>, TDC, TYO,</i> and <i>hpaBC, ΔtyrRΔpheAΔfeaB</i>                                                          | 268.3<br>shake flasks                             | Not shown         | 8.9                   | 3          |
| <i>E. coli</i>          | Glucose             | <i>aroE, aroD, aroB<sup>OPT</sup>, aroG<sup>br</sup>, ppsA, tktA, tyrB, tyrA<sup>br</sup>, aroC, aroA, aroL, PcAAS, RsTYR, yqhD</i>               | 270.8<br>shake flasks                             | 27.1              | 6.0                   | 4          |
| <i>E. coli</i>          | Glucose<br>glycerol | <i>tyrA<sup>br</sup>, ppsA, tktA, aroG<sup>br</sup>, ARO10, ADH6, hpaBCΔfeaBΔpheAΔtyrA</i>                                                        | 647.0<br>shake flasks                             | 34.2              | 13.5                  | 5          |
| <i>E. coli</i>          | Glucose             | <i>ΔfeaB ΔpheAΔtyrBΔtyrRΔtrpE ΔpabB ΔpabAΔpykFΔpoxB, 5*ARO10*, EchpaBC</i>                                                                        | 1810.0<br>shake flasks<br>2950.0<br>5L bioreactor | 90.5<br>Not shown | 37.7<br>122.9         | 6          |
| <i>S. cerevisiae</i>    | Sucrose<br>glycerol | <i>ARO4<sup>K229L</sup>, ARO7<sup>G141S</sup>, Bbx<sup>fpk</sup><sup>opt</sup>, Pcaas<sup>opt</sup>, PahpaBC<sup>opt</sup>, ΔGAL80</i>            | 308.7<br>shake flasks                             | Not shown         | 3.2                   | 7          |
| <i>S. cerevisiae</i>    | Glucose             | <i>ARO3<sup>D154N</sup>, ARO4<sup>K229L</sup>, ARO7<sup>G141S</sup>, ARO10, EchpaBC,</i>                                                          | 375.0<br>shake flasks                             | 2.2               | 1.5                   | 8          |
| <i>S. cerevisiae</i>    | Glucose             | <i>ARO2, ARO3<sup>D154N</sup>, ARO4<sup>K229L</sup>, ARO7<sup>G141S</sup>, ARO10, TKL1, RKII, PahpaB, EchpaC, TRP2↓, ΔTRP1</i>                    | 1120.0<br>shake flasks<br>6970.0<br>5L bioreactor | 56<br>36.5        | 13.3<br>79.2          | 9          |
| <i>B. licheniformis</i> | Glucose             | <i>aroG<sup>br</sup>, 2*tyrA<sup>br</sup>, aroK, EchpaBC, yugJ, kivD<sup>VI</sup>, glcU, glcK, tkt, zwf, ΔpykΔhisCΔpheAΔdhaSΔdhaCΔadhA, ptsG↓</i> | 6299.0<br>shake flasks<br>9475.0<br>5L bioreactor | 157.3<br>135.4    | 131.2<br>395.0        | This study |

↓ : means: Down-regulation of gene expression



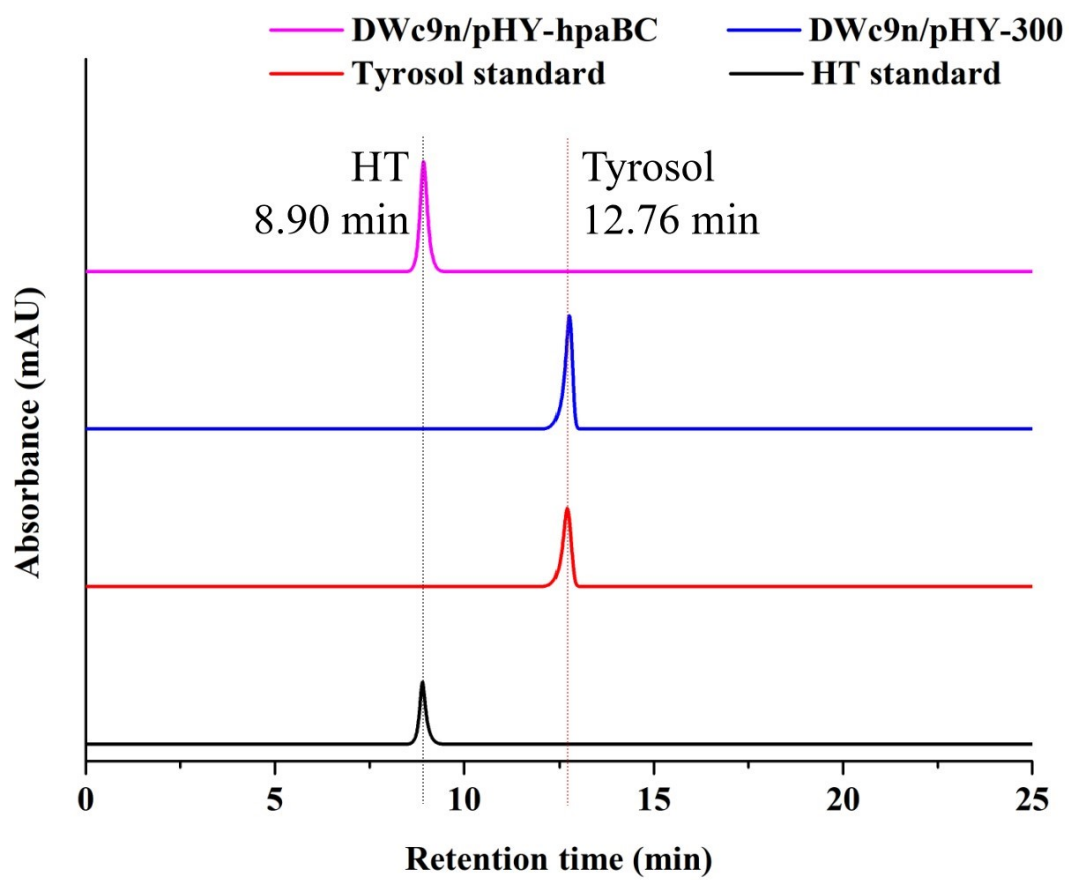

Fig. S1 HPLC spectra of HT and tyrosol

a HT sample

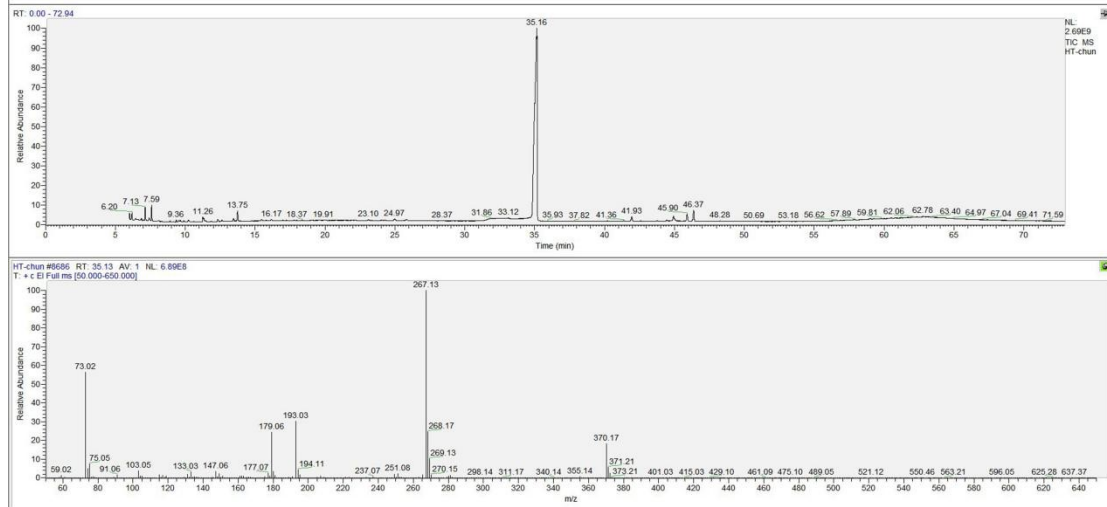

b HT standard

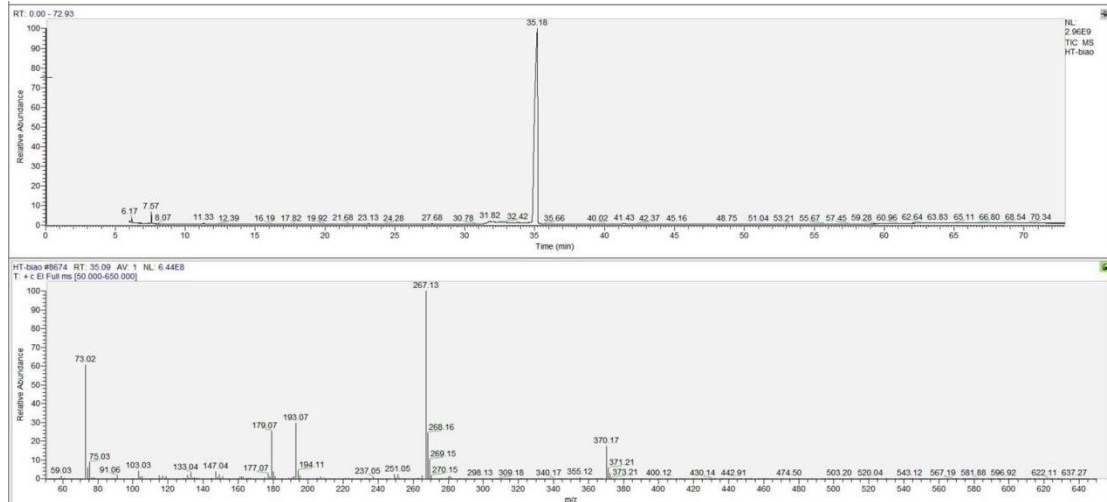

Fig. S2 The results of GC-MS of HT sample and standard

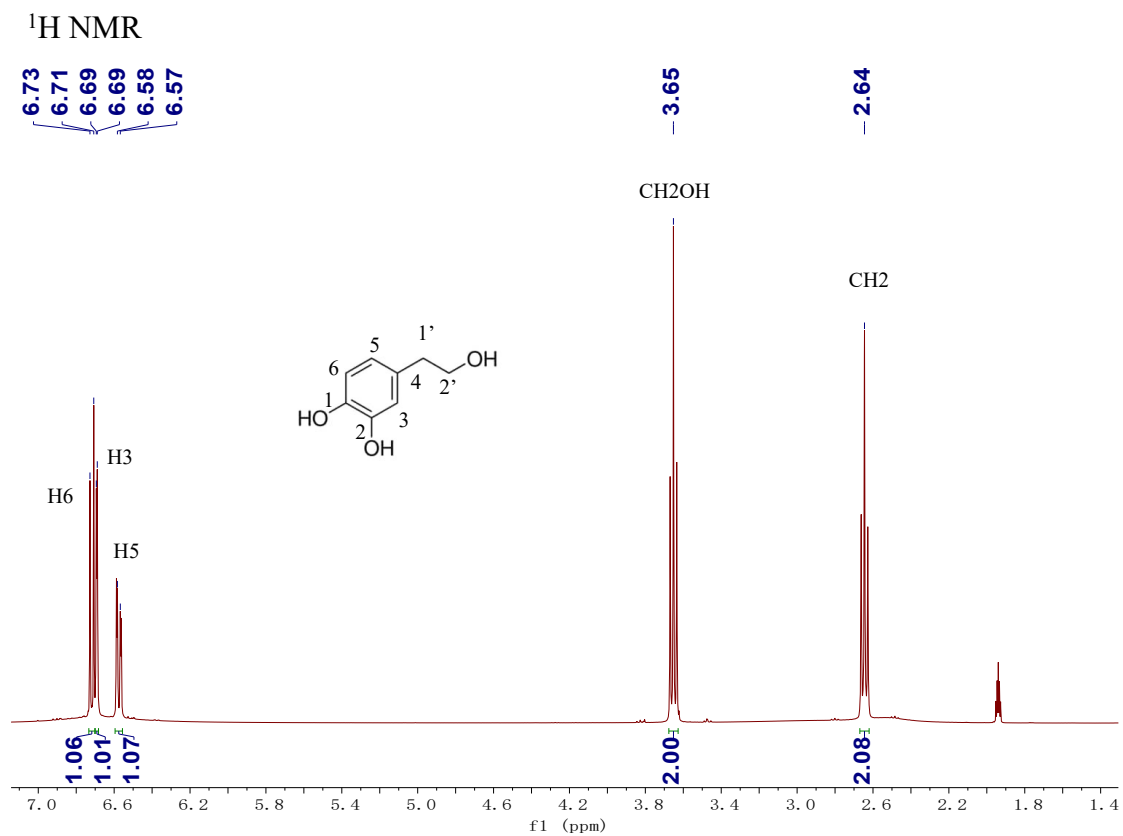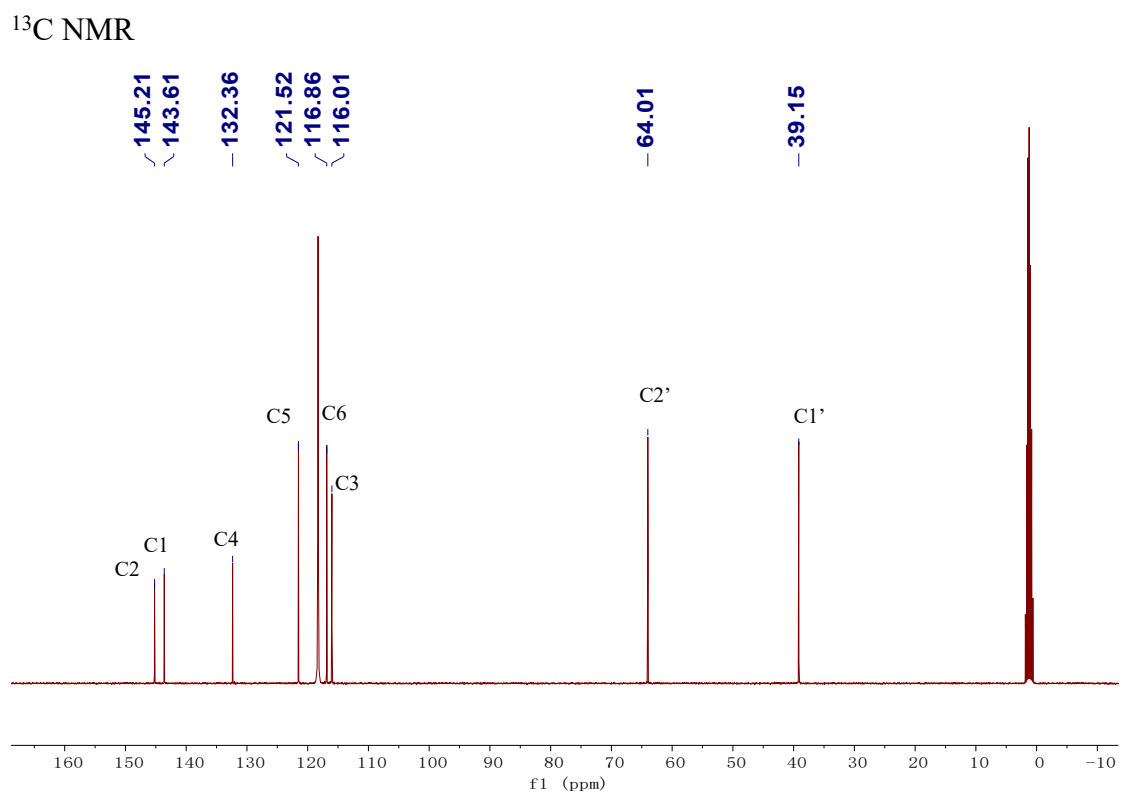

**Fig. S3 <sup>1</sup>H and <sup>13</sup>C NMR spectra of purified HT.**

The chemical shifts are in parts per million (Solvent:Acetonitrile-d<sub>3</sub>)

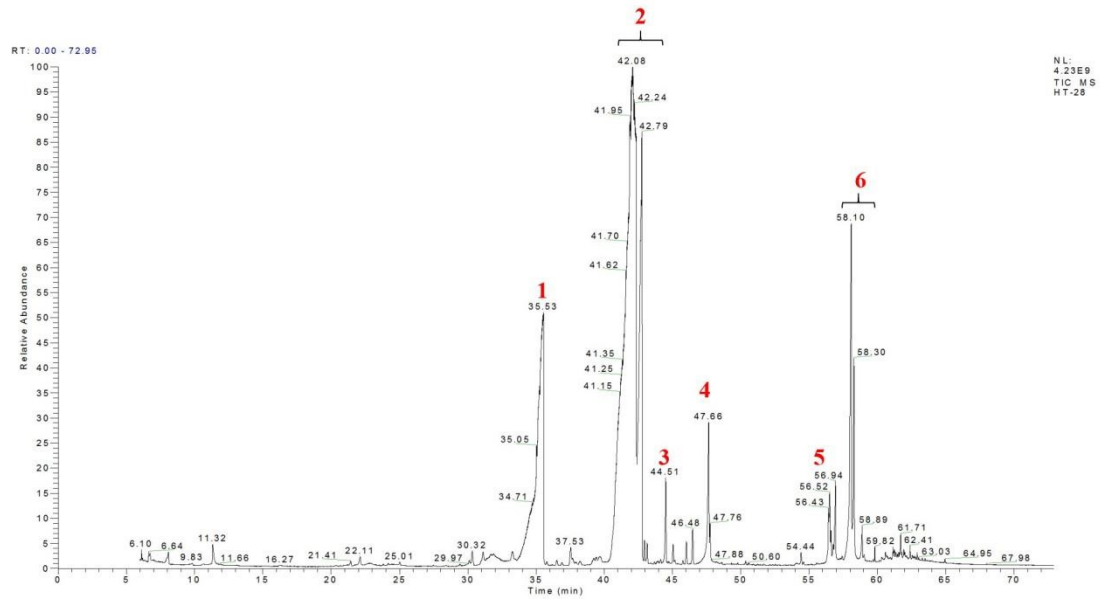

**Fig. S4 GC-MS analysis results of the main extracellular metabolites of DHT23 strain at 24 h.** 1: HT, 2: glucose, 3: 2, 5-dihydroxymandelic acid, 4: galactose, 5: 3,4-Dihydroxyphenylacetic acid, 6: N-Acetyl-D-galactosamine

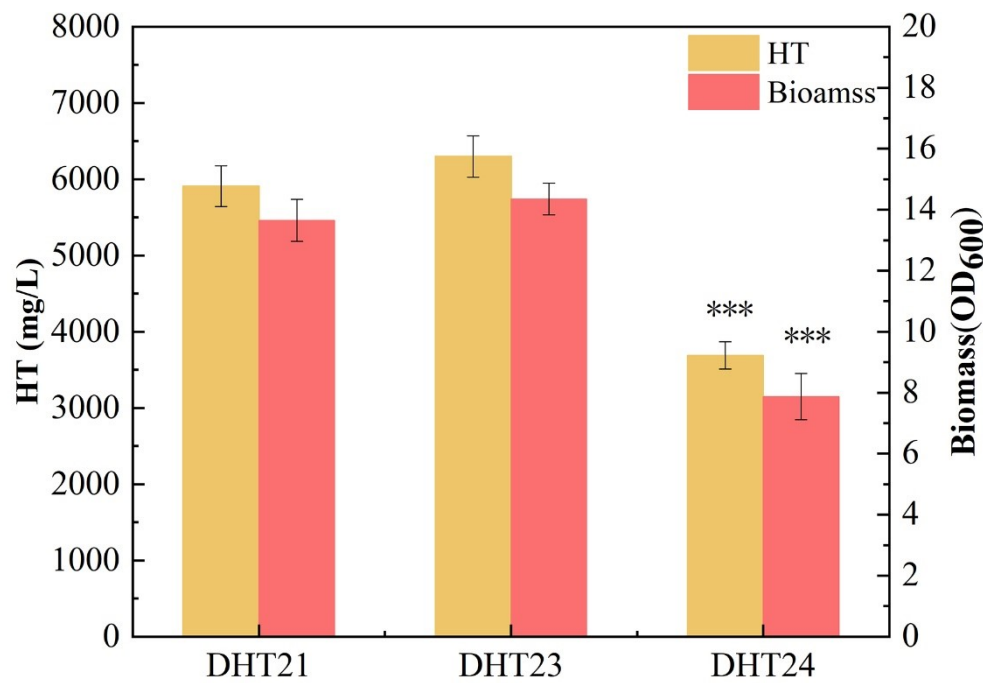

**Fig. S5 Effects of *xfpK* introduction on HT production**

\*\*\*,  $p < 0.001$  indicate the significance levels between DHT21 and DHT24 introducing *xfpK* strains.

**DNA sequence of TyrA<sup>fbr</sup>**

ATGGTTGCTGAATTGACCGCATTACGCGATCAAATTGATGAAGTCGATAA  
AGCGCTGCTGAATTTATTAGCGAAGCGTCTGGAAGTGGTTGCTGAAGTGG  
GCCGAGGTGAAAAGCCGCTTTGGACTGCCTATTTATGTTCCGGAGCGCGAG  
GCATCTATCTTGGCCTCGCGTCGTGCAGAGGCGGAAGCTCTGGGTGTACC  
GCCAGATCTGATTGAGGATGTTTTGCGTCGGGTGATGCGTGAATCTTACTC  
CAGTGAAAACGACAAAGGATTTAAAACACTTTGTCCGTCACTGCGTCCGG  
TGGTTATCGTTCGGCGGTGGCGGTGAGATGGGACGCCTGTTGAGAAGATG  
CTGACCCTCTCGGGTTATCAGGTGCGGATTCTGGAGCAACATGACTGGGA  
TCGAGCGGCTGATATTGTTGCCGATGCCGGAATGGTGATTGTTAGTGTGCC  
AATCCACGTTACTGAGCAAGTTATTGGCAAATTACCGCCTTTACCGAAAG  
ATTGTATTCTGGTCGATCTGGCATCAGTGAAAAATGGGCCATTACAGGCC  
ATGCTGGTGGCGCATGATGGTCCGGTGCTGGGGCTACACCCGATGTTCCGG  
TCCGGACAGCGGTAGCCTGGCAAAGCAAGTTGTGGTCTGGTGTGATGGAC  
GTAAACCGGAAGCATAACCAATGGTTTCTGGAGCAAATTCAGGTCTGGGGC  
GCTCGGTGCATCGTATTAGCGCCGTCGAGCACGATCAGAATATGGCGTT  
TATTCAGGCACTGCGCCACTTTGCTACTTTTGCTTACGGGCTGCACCTGGC  
AGAAGAAAATGTTTCAGCTTGAGCAACTTCTGGCGCTCTTTCGCCGATTA  
CCGCCTTGAGCTGGCGATGGTCGGGCGACTGTTTGCTCAGGATCCGCAGC  
TTTATGCCGACATCATTATGTCGTCAGAGCGTAATCTGGCGTTAATCAAAC  
GTTACTATAAGCGTTTTCGGCGAGGCGATTGAGTTGCTGGAGCAGGGCGAT  
AAGCAGGCGTTTATTGACAGTTTCCGCAAGGTGGAGCACTGGTTCGGCGA  
TTACGTACAGCGTTTTTCAGAGTGAAAGCCGCGTGTTATTGCGTCAGGCGA  
ATGACAATCGCCAGTAA

**DNA sequence of AroG<sup>fbr</sup>**

ATGAATTATCAGAACGACGATTTACGCATCAAAGAAATCAAAGAGTTACT  
TCCTCCTGTCGCATTGCTGGAAAAATCCCCGCTACTGAAAATGCCGCGA  
ATACGGTTGCCCATGCCGAAAAGCGATCCATAAGATCCTGAAAGGTAAT  
GATGATCGCCTGTTGGTTGTGATTGGCCCATGCTCAATTCATGATCCTGTC  
GCGGCAAAGAGTATGCCACTCGCTTGCTGGCGCTGCGTGAAGAGCTGAA  
AGATGAGCTGGAAATCGTAATGCGCGTCTATTTTGAAAAGCCGCGTACCA  
CGGTGGGCTGGAAAGGGCTGATTAACGATCCGCATATGGATAATAGCTTC  
CAGATCAACGACGGTCTGCGTATAGCCCGTAAATTGCTGCTTGATATTAA  
CGACAGCGGTCTGCCAGCGGCAGGTGAGTTTCTCAATATGATCACCCAC  
AATATCTCGCTGACCTGATGAGCTGGGGCGCAATTGGCGCACGTACCACC  
GAATCGCAGGTGCACCGCGAACTGGCATCAGGGCTTTCTTGTCCGGTCGG  
CTTCAAAAATGGCACCGACGGTACGATTAAAGTGGCTATCGATGCCATTA  
ATGCCGCCGGTGCGCCGCACTGCTTCCTGTCCGTAACGAAATGGGGGCAT  
TCGGCGATTGTGAATACCAGCGGTAACGGCGATTGCCATATCATTCTGCG  
CGGCGGTAAAGAGCCTAACTACAGCGCGAAGCACGTTGCTGAAGTGAAA  
GAAGGGCTGAACAAAGCAGGCCTGCCAGCACAGGTGATGATCGATTTCA  
GCCATGCTAACTCGTCCAAACAATTCAAAAAGCAGATGGATGTTTGTGCT  
GACGTTTGCCAGCAGATTGCCGGTGGCGAAAAGGCCATTATTGGCGTGAT

GGTGAAAGCCATCTGGTGGAAAGGCAATCAGAGCCTCGAGAGCGGGGAG  
CCGCTGGCCTACGGTAAGAGCATCACCGATGCCTGCATCGGCTGGGAAGA  
TACCGATGCTCTGTTACGTCAACTGGCGAATGCAGTAAAAGCGCGTCGCG  
GGTAA

**DNA sequence of KivD<sup>VI</sup>**

ATGTATACAGTAGGAGATTACCTATTAGACCGATTACACGAGTTAGGAAT  
TGAAGAAATTTTTGGAGTCCCTGGAGACTATAACTTACAATTTTTAGATCA  
AATTATTTCCCGCAAGGATATGAAATGGGTTCGGAAATGCTAATGAATTAA  
ATGCTTCATATATGGCTGATGGCTATGCTCGTACTAAAAAAGCTGCCGCAT  
TTCTTACAACCTTTGGAGTAGGTGAATTGAGTGCAGTTAATGGATTAGCAG  
GAAGTTACGCCGAAAATTTACCAGTAGTAGAAATAGTGGGATCACCTACA  
TCAAAGTTCAAATGAAGGAAAATTTGTTTCATCATAACGCTGGCTGACGG  
TGATTTTAAACACTTTATGAAAATGCACGAACCTGTTACAGCAGCTCGAA  
CTTTACTGACAGCAGAAAATGCAACCGTTGAAATTGACCGAGTACTTTCT  
GCACTATTAAGAAAGAAAACCTGTCTATATCAACTTACCAGTTGATGT  
TGCTGCTGCAAAGCAGAGAAACCCTCACTCCCTTTGAAAAAAGAAAACCT  
CAACTTCAAATACAAGTGACCAAGAGATCTTGAACAAAATTCAAGAAAGC  
TTGAAAATGCCAAAAACCAATCGTGATTACAGGACATGAAATAATTAG  
TTTTGGCTTAGAAAAACAGTCTCTCAATTTATTTCAAAGACAAAACCTACC  
TATTACGACATTAACCTTTGGAAAAAGTTCAGTTGATGAAGCTCTCCCTTC  
ATTTTTAGGAATCTATAATGGTAAACTCTCAGAGCCTAATCTTAAAGAATT  
CGTGGAATCAGCCGACTTCATCCTGATGCTTGGAGTTAAACTCACAGACT  
CTTCAACAGGAGCCTTCACTCATTTTAAATGAAAATAAAATGATTTTAC  
TGAATATAGATGAAGGAAAAATATTTAACGAAAGCATCCAAAATTTTGAT  
TTTGAATCCCTCATCTCCTCTCTCTTAGACCTAAGCGAAATAGAATACAAA  
GGAAAATATATCGATAAAAAGCAAGAAGACTTTGTTCCATCAAATGCGCT  
TTTATCACAGACCGCCTATGGCAAGCAGTTGAAAACCTAACTCAAAGCA  
ATGAAACAATCGTTGCTGAACAAGGGACATCATTCTTTGGCGCTTCATCA  
ATTTTCTTAAACCAAAGAGTCATTTTATTGGTCAACCCTTATGGGGATCA  
ATTGGATATACATTCCCAGCAGCATTAGGAAGCCAAATTGCAGATAAAGA  
AAGCAGACACCTTTTATTTATTGGTGATGGTTCCTTCAACTTACGGTGCA  
AGAATTAGGATTAGCAATCAGAGAAAAAATTAATCCAATTTGCTTTATTA  
TCAATAATGATGGTTATACAGCCGAAAGAGAAATTCATGGACCAAATCAA  
AGCTACAATGATATTTCCAATGTGGAATTACTCAAATTACCAGAATCATTT  
GGAGCAACAGAAGAACGAGTAGTCTCGAAAATCGTTAGAACTGAAAATG  
AATTTGTGTCTGTCATGAAAGAAGCTCAAGCAGATCCAAATAGAATGTAC  
TGGATTGAGTTAATTTTGGCAAAGAAGATGCACCAAAGTACTGAAAAA  
AATGGGCAAACCTATTTGCTGAACAAAATAAATCATAA

**DNA sequence of AdhA**

ATGGTTCCGGGACATGAAATCGCCGGCGTTGTCAAAGCAGTAGGACCAGA  
CGTAAAAAATTTGCTGTCGGCGACCGCGTCGGGGTCGGCTGCTTCGTCG  
ACTCCTGCGGCGAATGTGAGTACTGTTCGGAGCGGAGAGGAGCAATTTTGT

ACGAAAGGCGTGATCCAAACGTATAACTGTTTAGACTACGATGGTCATCC  
GACATACGGCGGTTACAGCCAGTACATCGTGGTCAAAGAAGATTTTCGTTG  
TCCGCATTCCGGACAGTCTGAACTTGGATGCTGCCAGCCCGCTCTTATGCG  
CGGGCATTACCACGTACTCTCCTTTGAAGCATTGGAACGCAGGTCCCGGC  
AAGAAAATTGCCGTTGTTGGAATGGGGGGACTCGGCCATGTCGCCATCCA  
ATTCGCGCATGCCATGGGGGCAGAAGTAACGGTCCTGAGCCGCTCTTTGA  
ATAACAAGAAGAAGCCTTGCCTTTTGGCGCAGACCATTATGTTGCAACT  
AGTGATCCTGCTGTATTTATTGAACTGGCCGGCCGTTTTGACCTCATTTTA  
AACACGGTGTGAGCCAATCTCGACGTTGATGCCTATTTATCGCTTCTTCGT  
GTAGATGGAACACTTGTTAACGTCGGTGCGCCGGCAGAACCGGATCAGTA  
CAGTGTGTTTTCTTAATTATGGGCCGCCGCAGCATTGCAGGTTGCTAGT  
CGGCCGCATTTCGCGAGACACAAGAGATGCTTGATTTTCGCTGCTGAACACG  
GCATCGCTCCGCAAATTGAAGTCATCGGAGCGGACCAAGTAGATGAAGCG  
TATGAGCGCGTACTTCGCAGCGATGTGCGTTATCGATTTCGTGATTGATATC  
TCCAATTTGTAA



## References

1. K. Li, D. Cai, Z. Wang, Z. He and S. Chen, *Appl Environ Microbiol*, 2018, **84**.
2. Y. Satoh, K. Tajima, M. Munekata, J. D. Keasling and T. S. Lee, *Metab Eng*, 2012, **14**, 603-610.
3. H. J. Choo, E. J. Kim, S. Y. Kim, Y. Lee, B.-G. Kim and J.-H. Ahn, *Appl Biol Chem*, 2018, **61**, 295-301.
4. E. Trantas, E. Navakoudis, T. Pavlidis, T. Nikou, M. Halabalaki, L. Skaltsounis and F. Ververidis, *PLoS One*, 2019, **14**, e0212243.
5. X. Li, Z. Chen, Y. Wu, Y. Yan, X. Sun and Q. Yuan, *ACS Synth Biol*, 2018, **7**, 647-654.
6. C. Liu, Y. Xia, L. Qi, H. Yang, L. Chen, W. Shen and X. Chen, *Sheng Wu Gong Cheng Xue Bao*, 2021, **37**, 4243-4253.
7. Y. Liu, H. Liu, H. Hu, K. R. Ng, R. Yang and X. Lyu, *J Agric Food Chem*, 2022, **70**, 7490-7499.
8. R. Bisquert, A. Planells-Carcel, E. Valera-Garcia, J. M. Guillamon and S. Muniz-Calvo, *Microb Biotechnol*, 2022, **15**, 1499-1510.
9. H. Liu, X. Wu, H. Ma, J. Li, Z. Liu, X. Guo, J. Dong, S. Zou and Y. Luo, *ACS Synth Biol*, 2022, **11**, 3706-3713.
